# Supplementary material for: Modular and coordinated activity of AAA+ active sites in the double-ring ClpA unfoldase of the ClpAP protease
Source: PubMed Central journal article supplement — Proc Natl Acad Sci U S A. 2020 Oct 13;117(41):25455–63. doi: 10.1073/pnas.2014407117 (PMC7568338; doi:10.1073/pnas.2014407117), 2020-10-13
Supplement: pnas.2014407117.sapp.pdf [file pnas.2014407117.sapp.pdf]

## SI Appendix

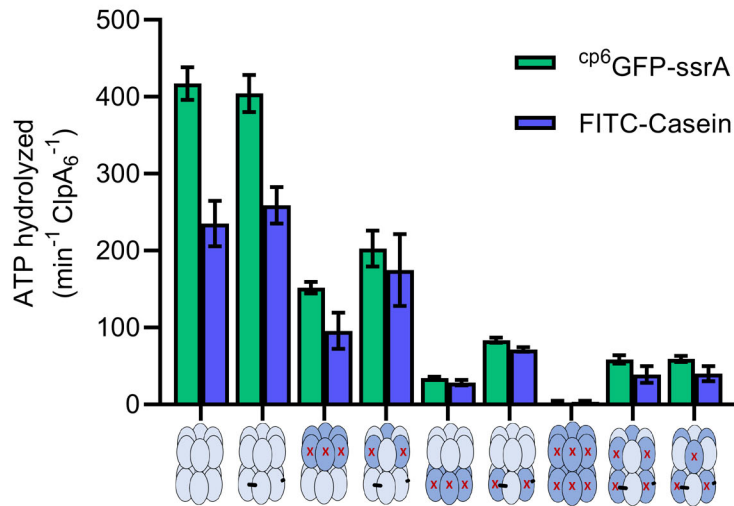

**S1. ATP hydrolysis by the ClpA/ClpP variants with substrates.** Rates of hydrolysis of ATP (5 mM) by ClpAP variants in the presence of <sup>cp6</sup>GFP-ssrA (20  $\mu$ M; green) or FITC-casein (50  $\mu$ M; blue). Experiments were performed using 0.25  $\mu$ M of each ClpA variant and 0.75  $\mu$ M ClpP. Values are averages ( $n = 6$ )  $\pm$  1 SD.

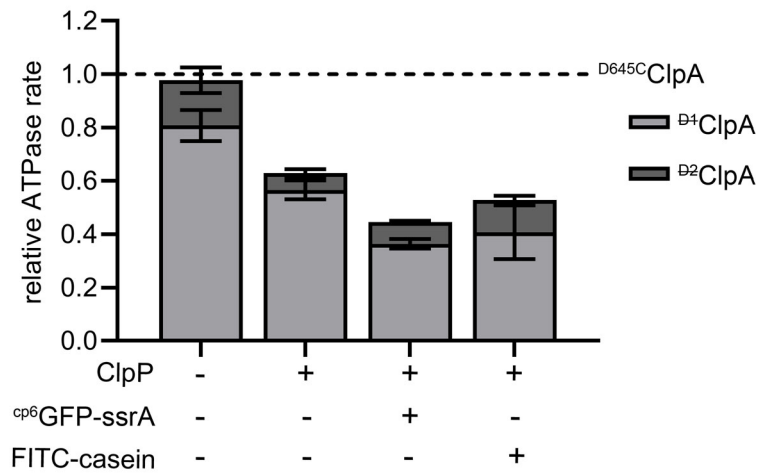

**S2. Relative contributions of the D1 and D2 rings to ATP hydrolysis under different conditions.** The relative ATPase rates of  $D^1$ ClpA and  $D^2$ -ClpA roughly add up to the ATP-hydrolysis rate of the parental enzyme ( $D^{645C}$ ClpA) in the absence of ClpP and substrates. However, the summed ATPase rate is lower than predicted (44-62%) of this rate when ClpP or ClpP and protein substrates were present. Values are averages ( $n \geq 4$ )  $\pm$  1 SD.

| ClpA variant                                                               | Active D1 modules | Active D2 modules | $\Sigma$ |       |                                        |                           |
|----------------------------------------------------------------------------|-------------------|-------------------|----------|-------|----------------------------------------|---------------------------|
|                                                                            |                   |                   | -ClpP    | +ClpP | +ClpP<br>+ <sup>cp6</sup> GFP-<br>ssrA | +ClpP<br>+FITC-<br>casein |
| D645C ClpA, ClpA <sup>x</sup>                                              | 6                 | 6                 | 6        | 6     | 6                                      | 6                         |
| D <sup>1</sup> ClpA                                                        | 0                 | 6                 | 5.0      | 5.4   | 4.9                                    | 4.6                       |
| D <sup>2</sup> ClpA                                                        | 6                 | 0                 | 1        | 0.6   | 1.1                                    | 1.4                       |
| altD1 ClpA <sup>x</sup>                                                    | 3                 | 6                 | 5.5      | 5.7   | 5.4                                    | 5.3                       |
| altD2 ClpA <sup>x</sup>                                                    | 6                 | 3                 | 3.5      | 3.3   | 3.6                                    | 3.7                       |
| D <sup>1</sup> /D <sup>2</sup> ClpA                                        | 0                 | 0                 | 0        | 0     | 0                                      | 0                         |
| altD1/altD2/cis ClpA <sup>x</sup> ,<br>altD1/altD2/trans ClpA <sup>x</sup> | 3                 | 3                 | 3        | 3     | 3                                      | 3                         |

**Table S1.** Table listing calculated values of  $\Sigma$  for ClpA variants.  $\Sigma$  was calculated as the sum of number of active D1 sites (column 1) multiplied by the fractional contribution determined for each condition in Fig. 6B (0.17, 0.10, 0.18, 0.23 for -ClpP, +ClpP, +ClpP and <sup>cp6</sup>GFP-ssrA, and +ClpP and FITC-casein, respectively) plus the number of active D2 sites (column 2) multiplied by the fractional contribution determined in Fig. 6B (0.83, 0.90, 0.82, 0.77 for -ClpP, +ClpP, +ClpP and <sup>cp6</sup>GFP-ssrA, and +ClpP and FITC-casein, respectively). These  $\Sigma$  values were used as the x-axis in Fig. 6C-F.
